# Supplementary material for: A new class of 7-deazaguanine agents targeting autoimmune diseases: dramatic reduction of synovial fibroblast IL-6 production from human rheumatoid arthritis patients and improved performance against murine experimental autoimmune encephalomyelitis
Source: Royal Society of Chemistry journal article supplement (doi:10.1039/d4md00028e), 2024-01-01

## Supplementary Information

### **A new class of 7-deazaguanine agents targeting autoimmune diseases: dramatic reduction of synovial fibroblast IL-6 production from human rheumatoid arthritis patients and improved performance against murine experimental autoimmune encephalomyelitis.**

*Michelle Cotter,<sup>a</sup> Shauna M. Quinn,<sup>b</sup> Ursula Fearon,<sup>c</sup> Sharon Ansboro,<sup>c</sup> Tatsiana Rakovic,<sup>c</sup> John M. Southern,<sup>a\*</sup> Vincent P. Kelly<sup>b\*</sup> and Stephen J. Connon<sup>\*a</sup>*

<sup>a</sup>School of Chemistry, Trinity Biomedical Sciences Institute, 152-160 Pearse Street, Trinity College, Dublin, Ireland

<sup>b</sup>School of Biochemistry & Immunology, Trinity Biomedical Sciences Institute, 152-160 Pearse Street, Trinity College, Dublin, Ireland

<sup>c</sup>School Medicine, Trinity Biomedical Sciences Institute, 152-160 Pearse Street, Trinity College, Dublin, Ireland

#### **Table of Contents**

|     |                                                                                                                    |   |
|-----|--------------------------------------------------------------------------------------------------------------------|---|
| 1.0 | Figure S1: PBMC cell viability assays for selected compounds                                                       | 2 |
| 2.0 | Figure S2: Analysis of animal weights in the EAE study                                                             | 2 |
| 3.0 | <sup>1</sup> H and <sup>13</sup> C spectra of compounds <b>6</b> , <b>17</b> , <b>21</b> , <b>25</b> and <b>26</b> | 5 |

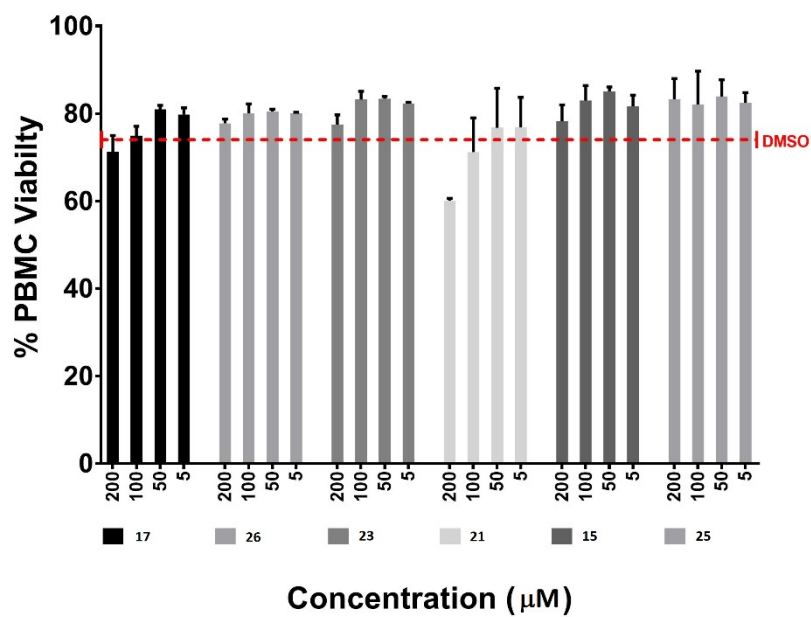

Figure S1: PBMC cell viability assays for selected compounds

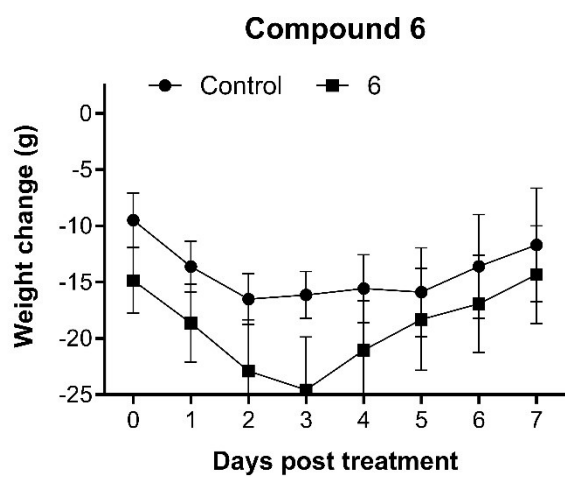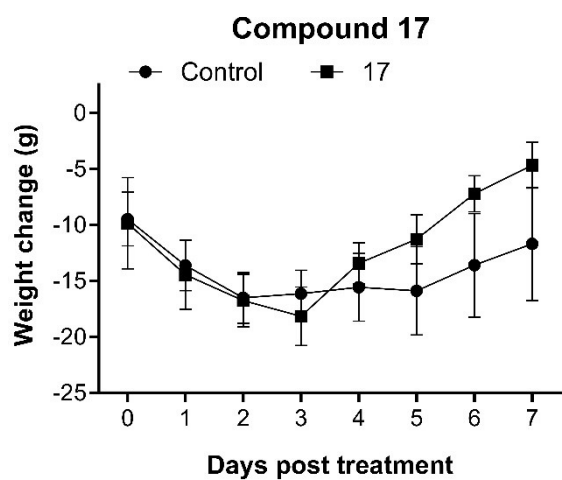

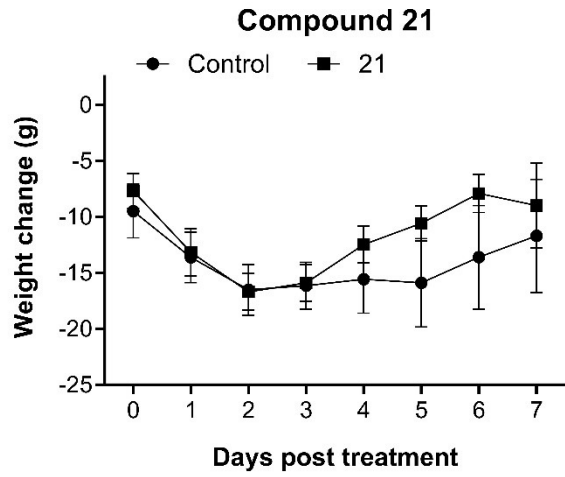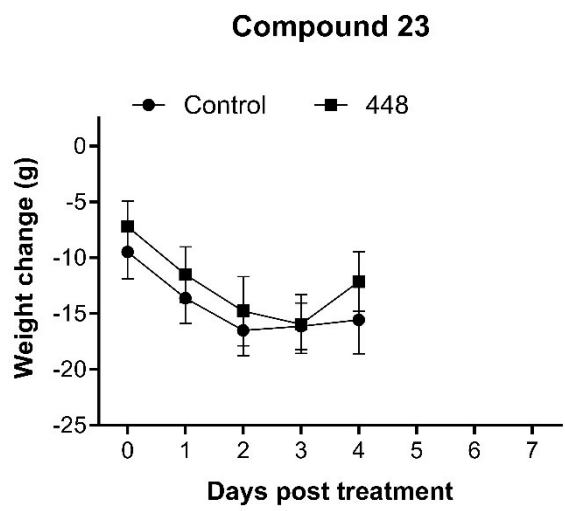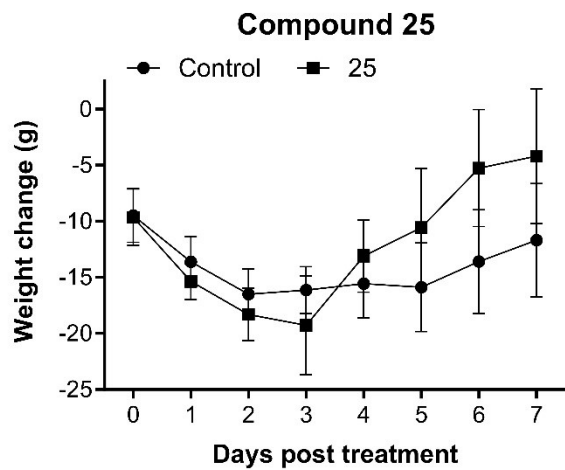

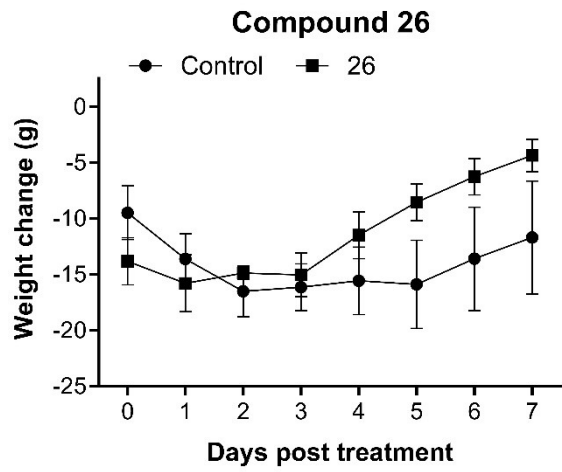

Figure S2: Weights of animals, data represent the mean  $\pm$  s.e.m.

<sup>1</sup>H and <sup>13</sup>C NMR (DMSO-*d*<sub>6</sub>) spectra for compounds 6, 17, 21, 25 and 26

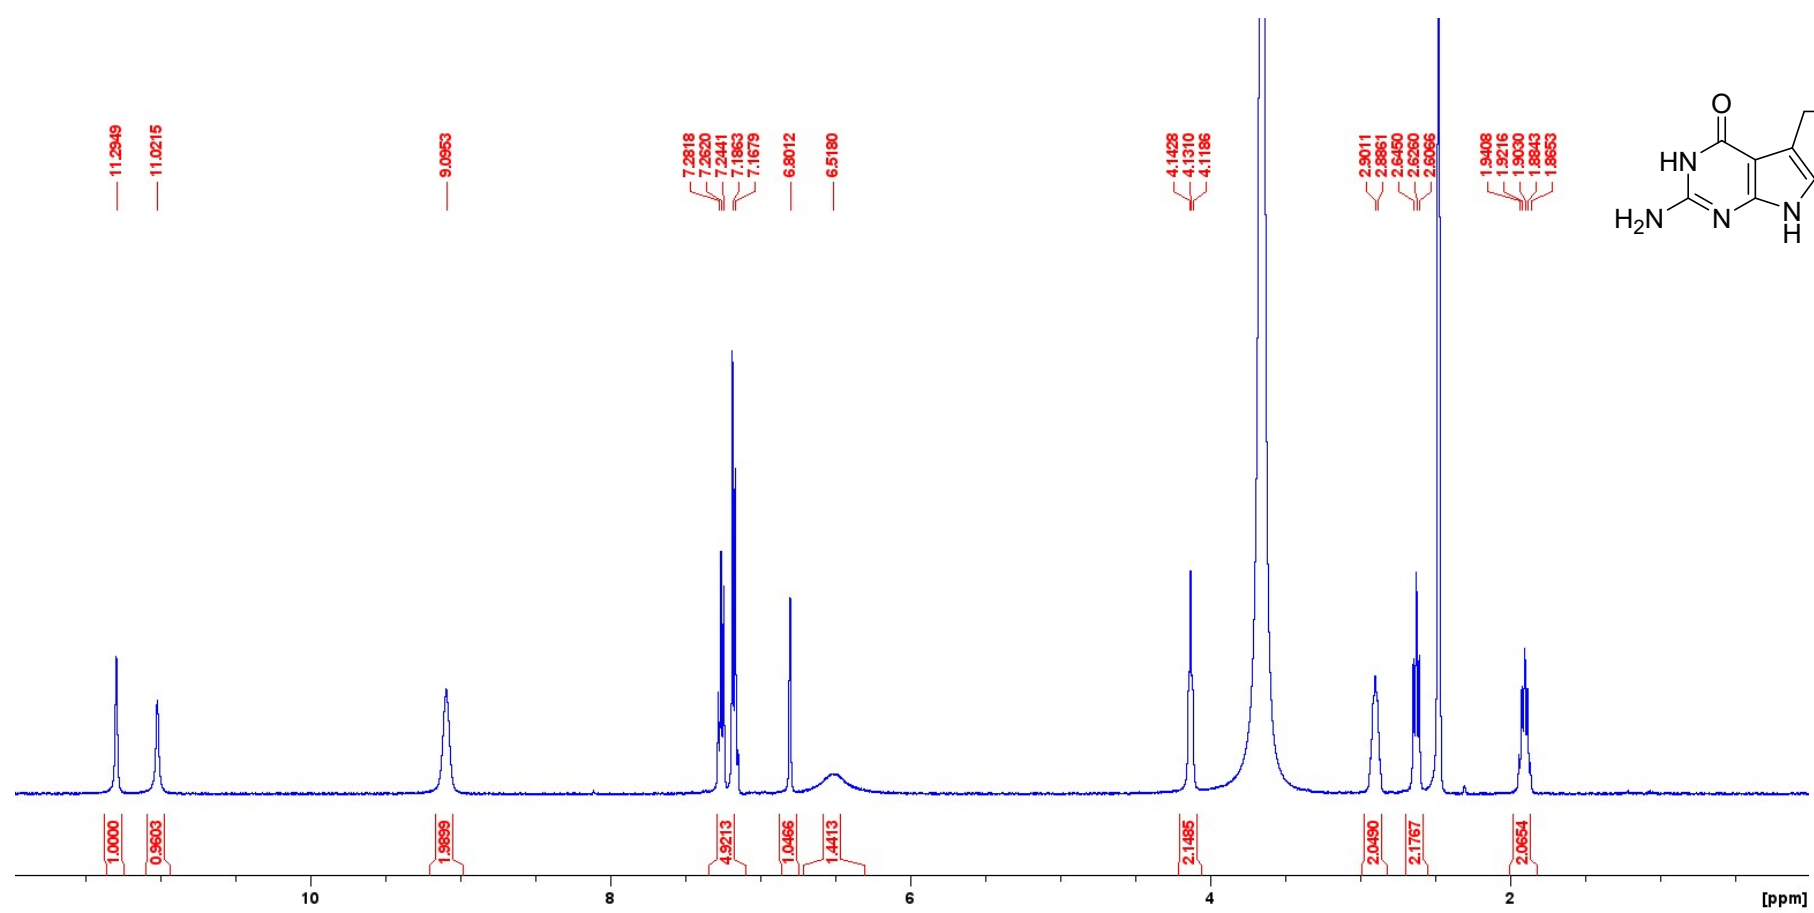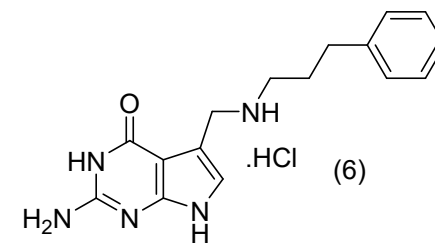

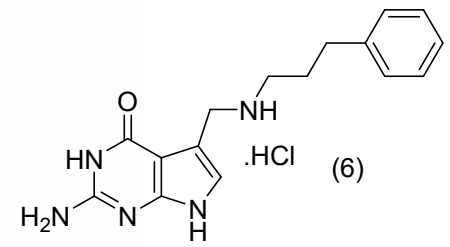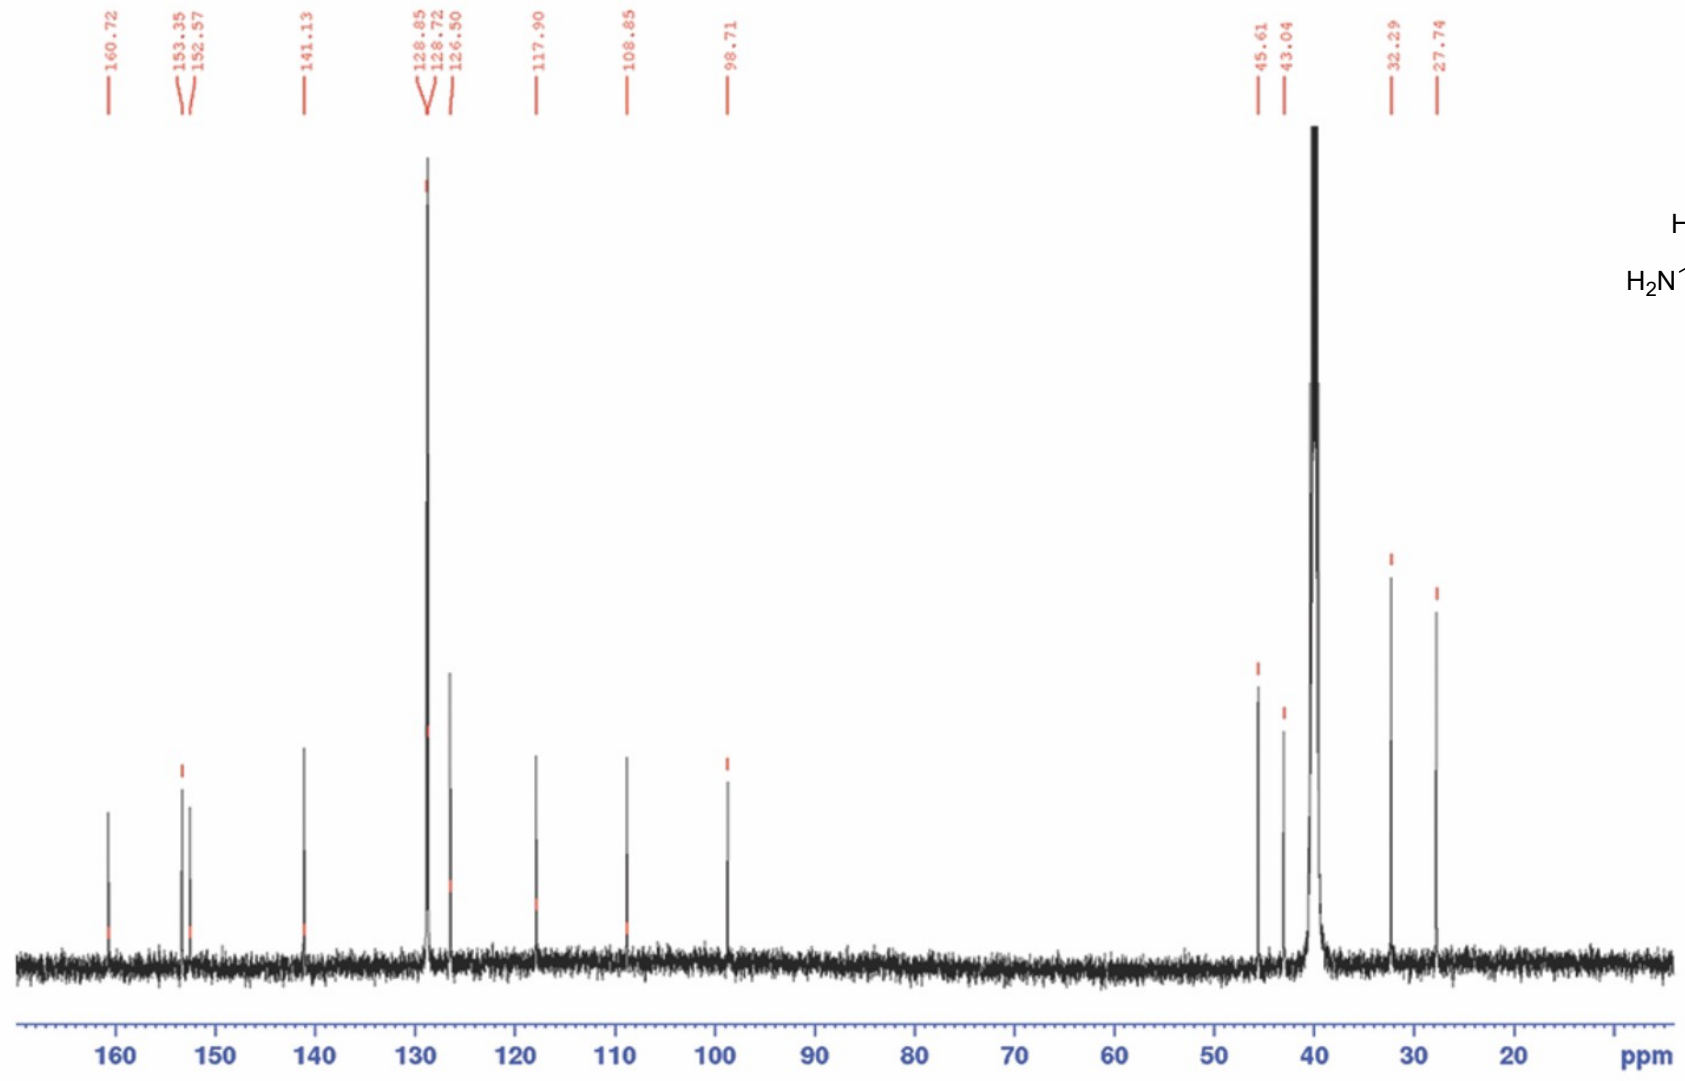

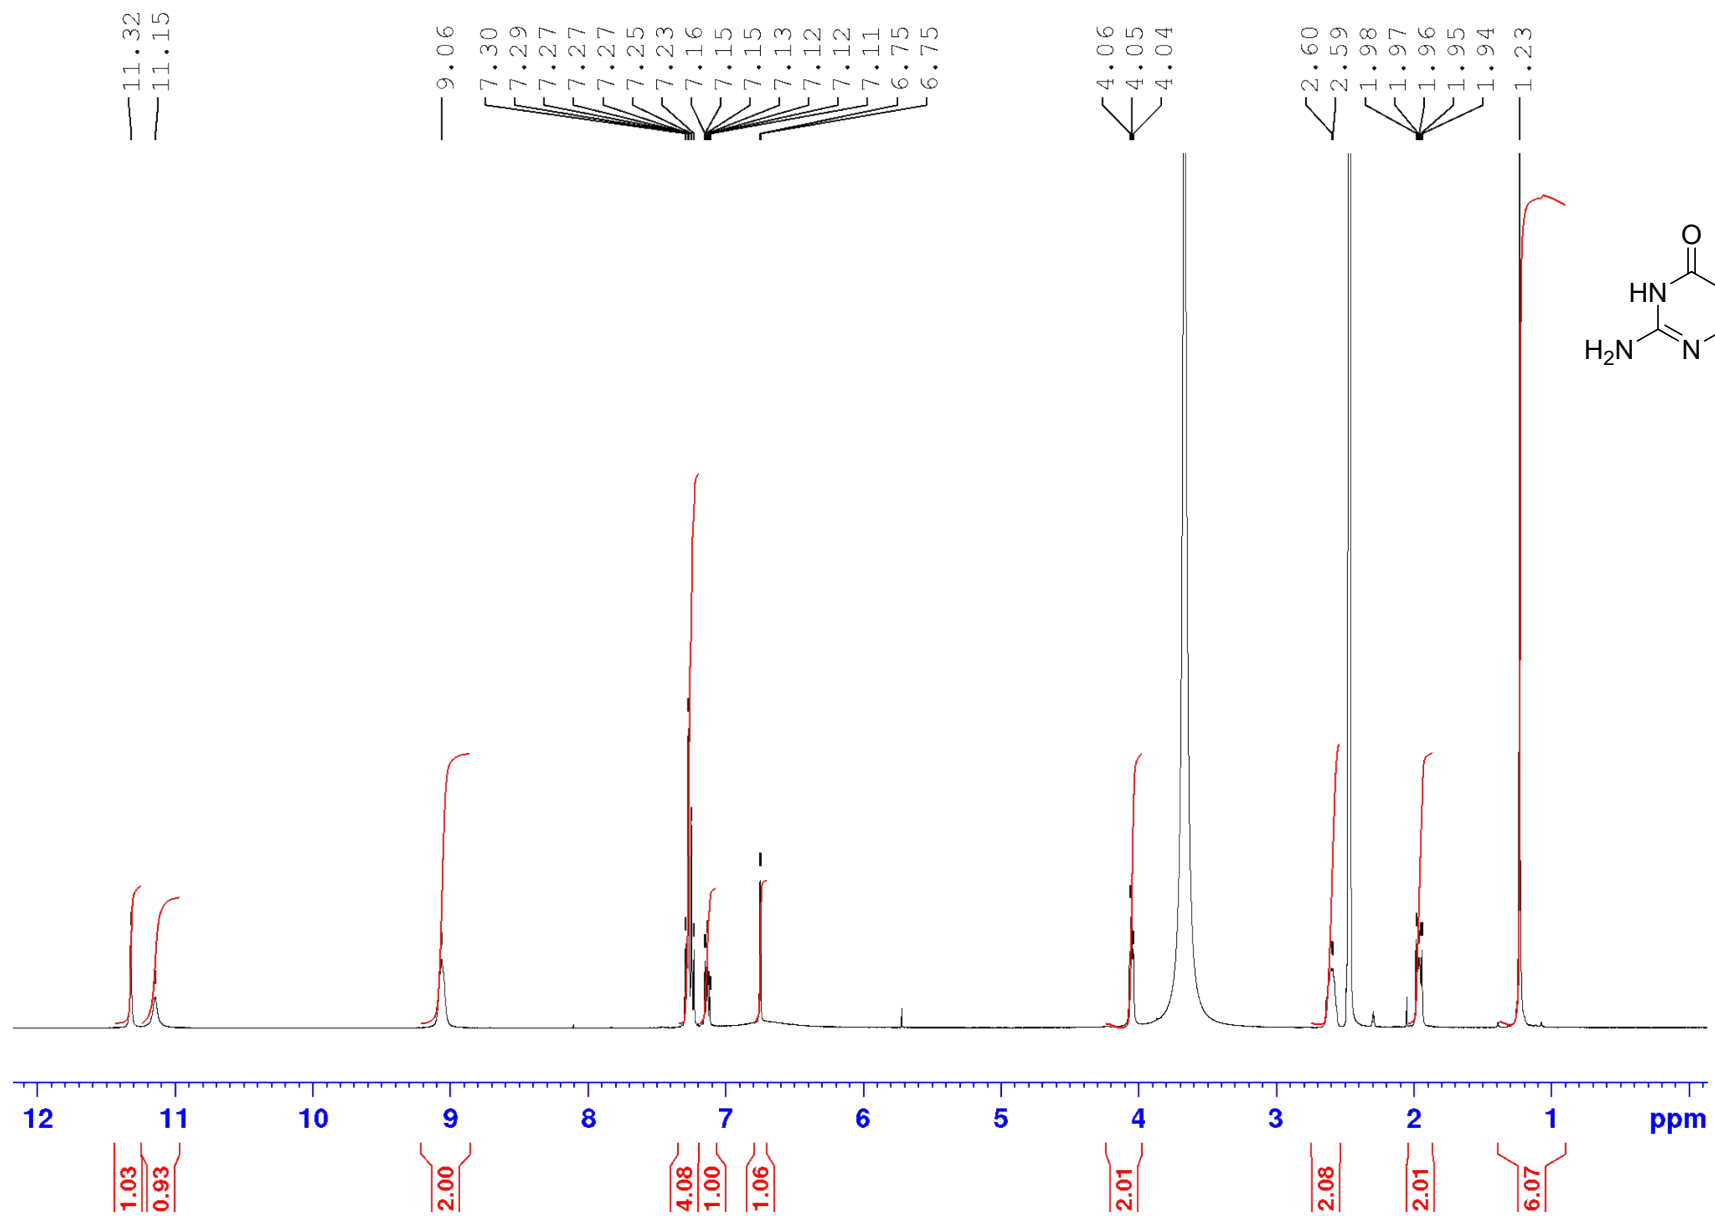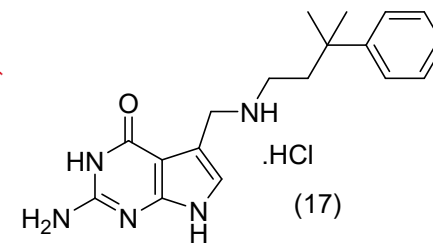

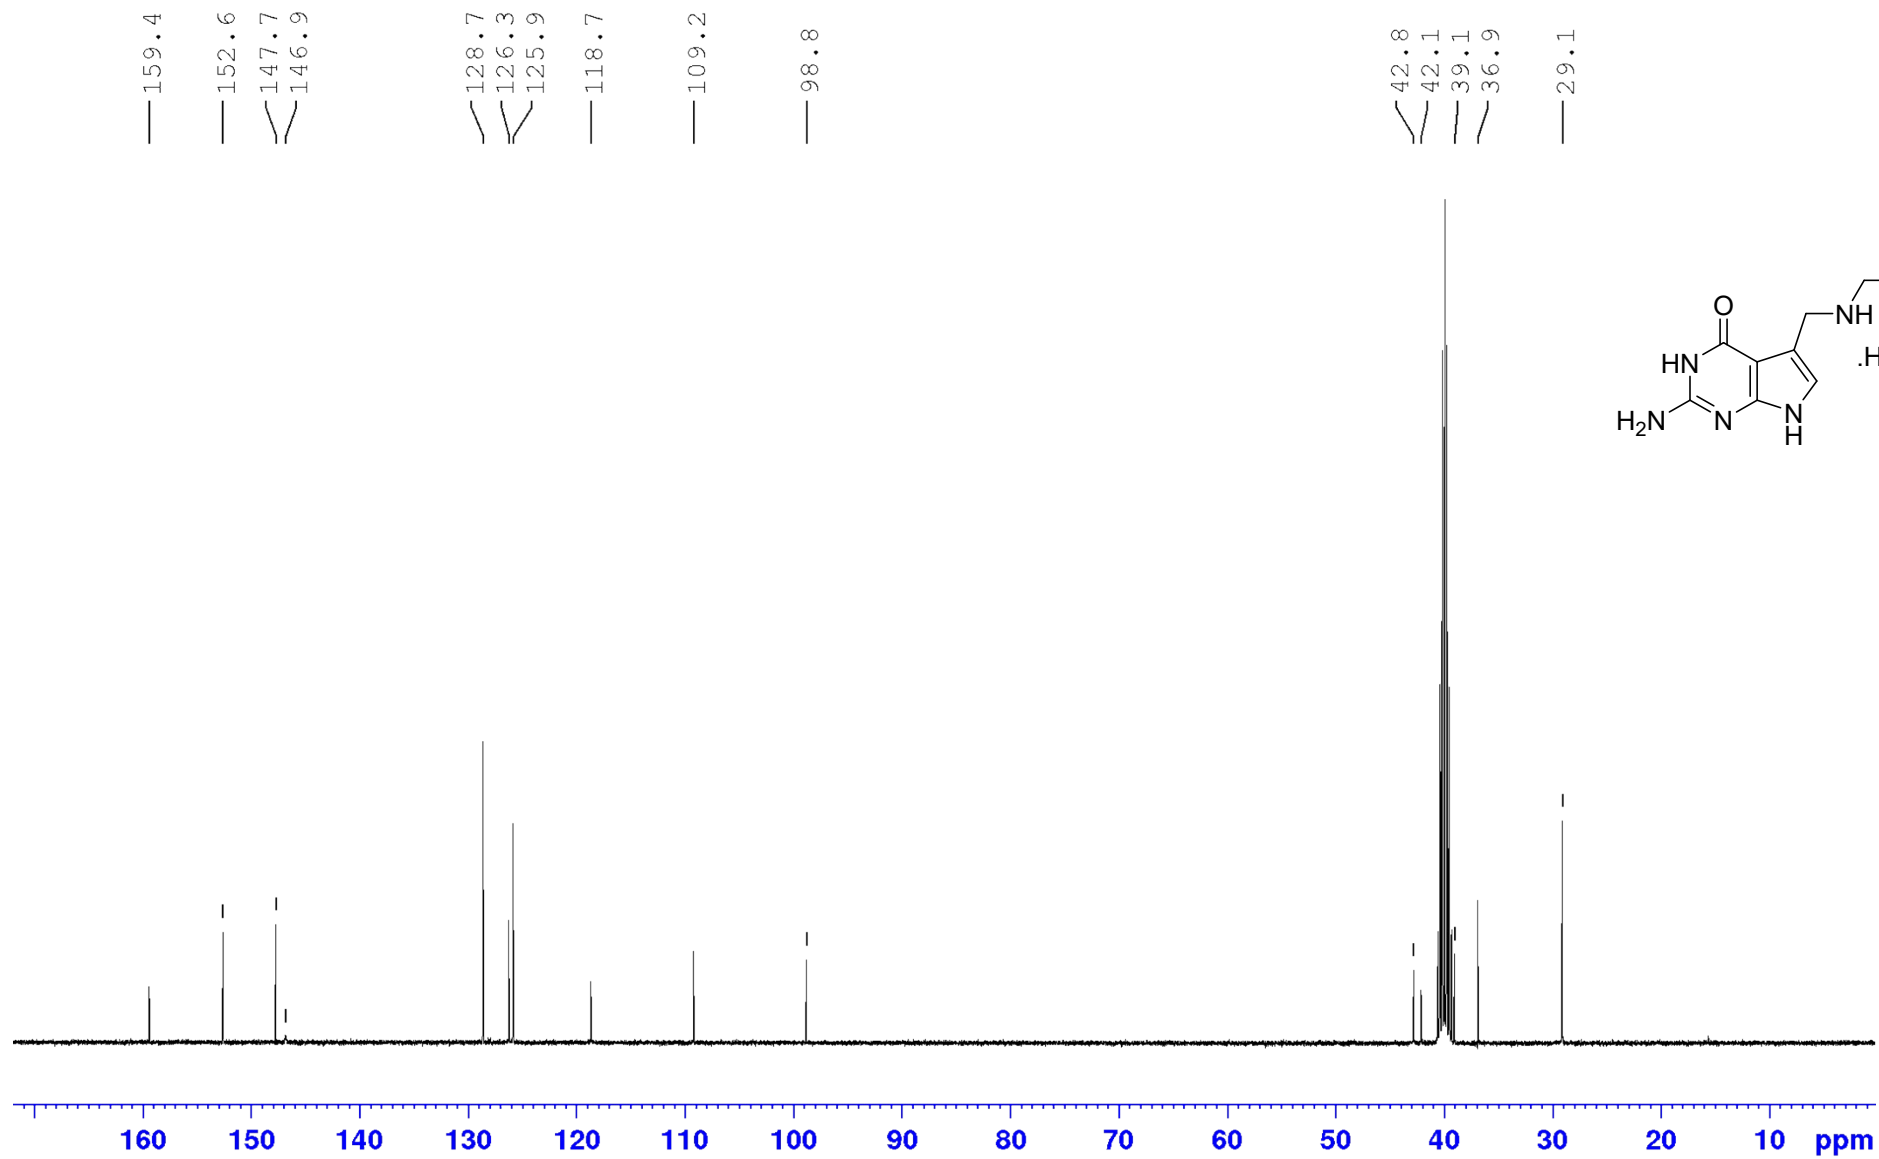



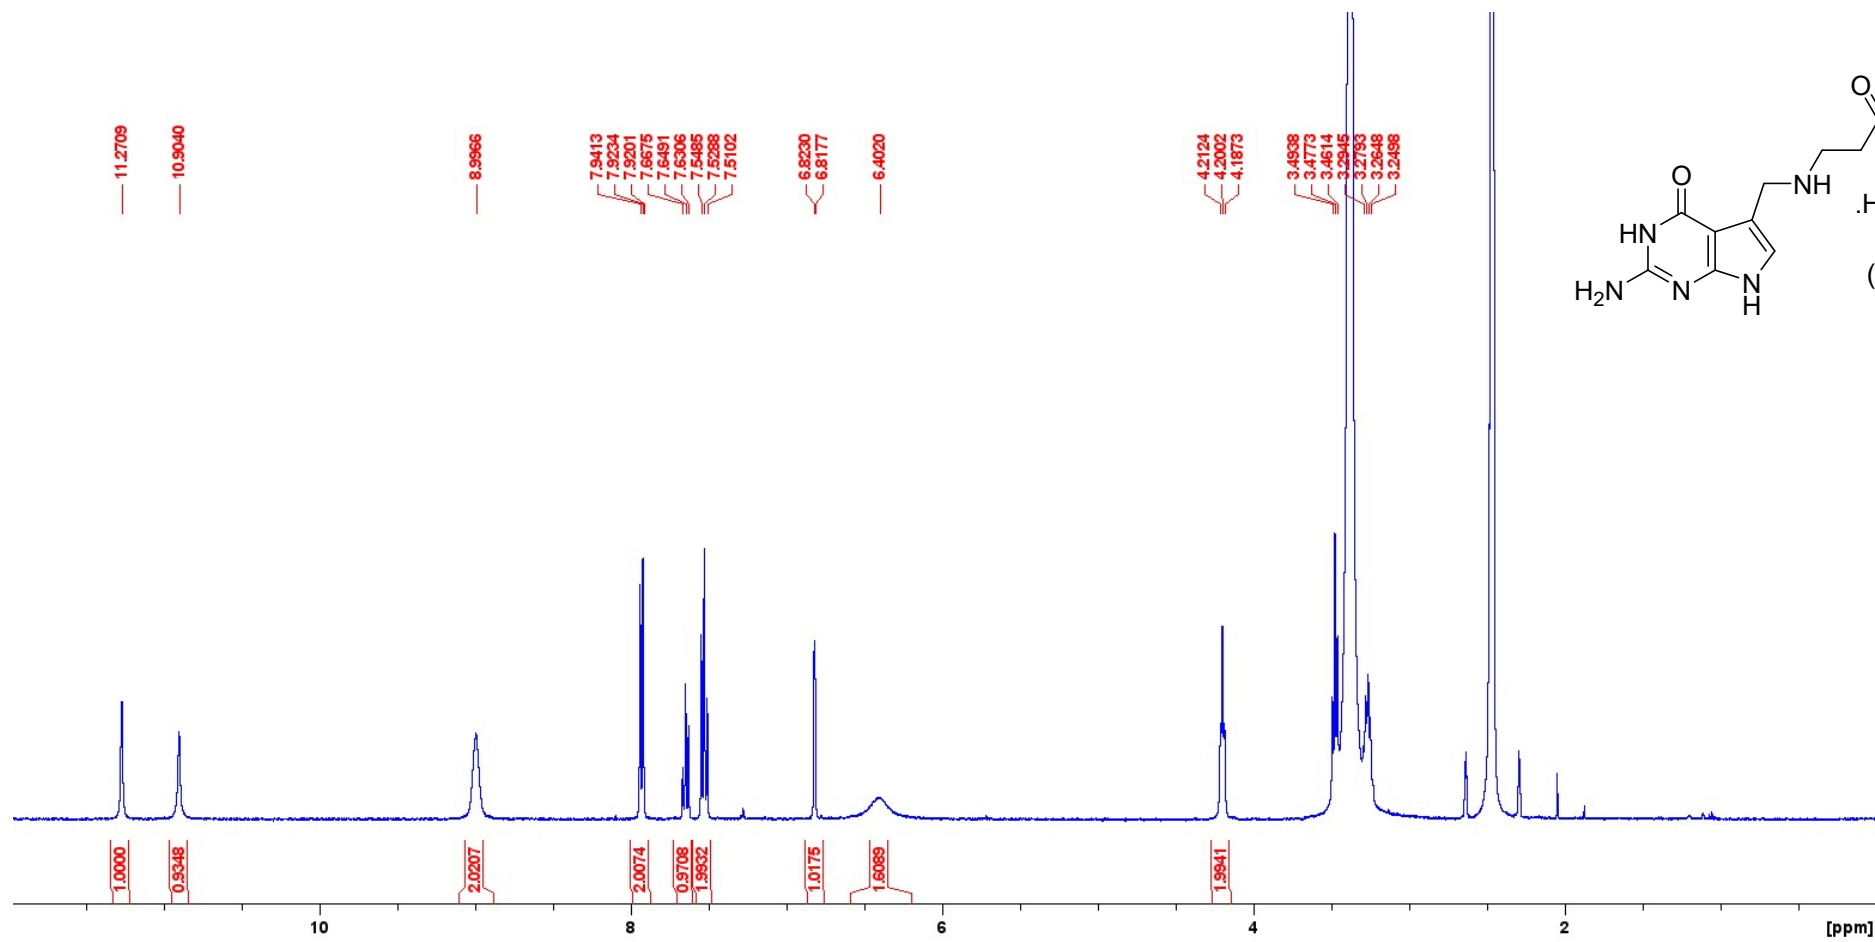

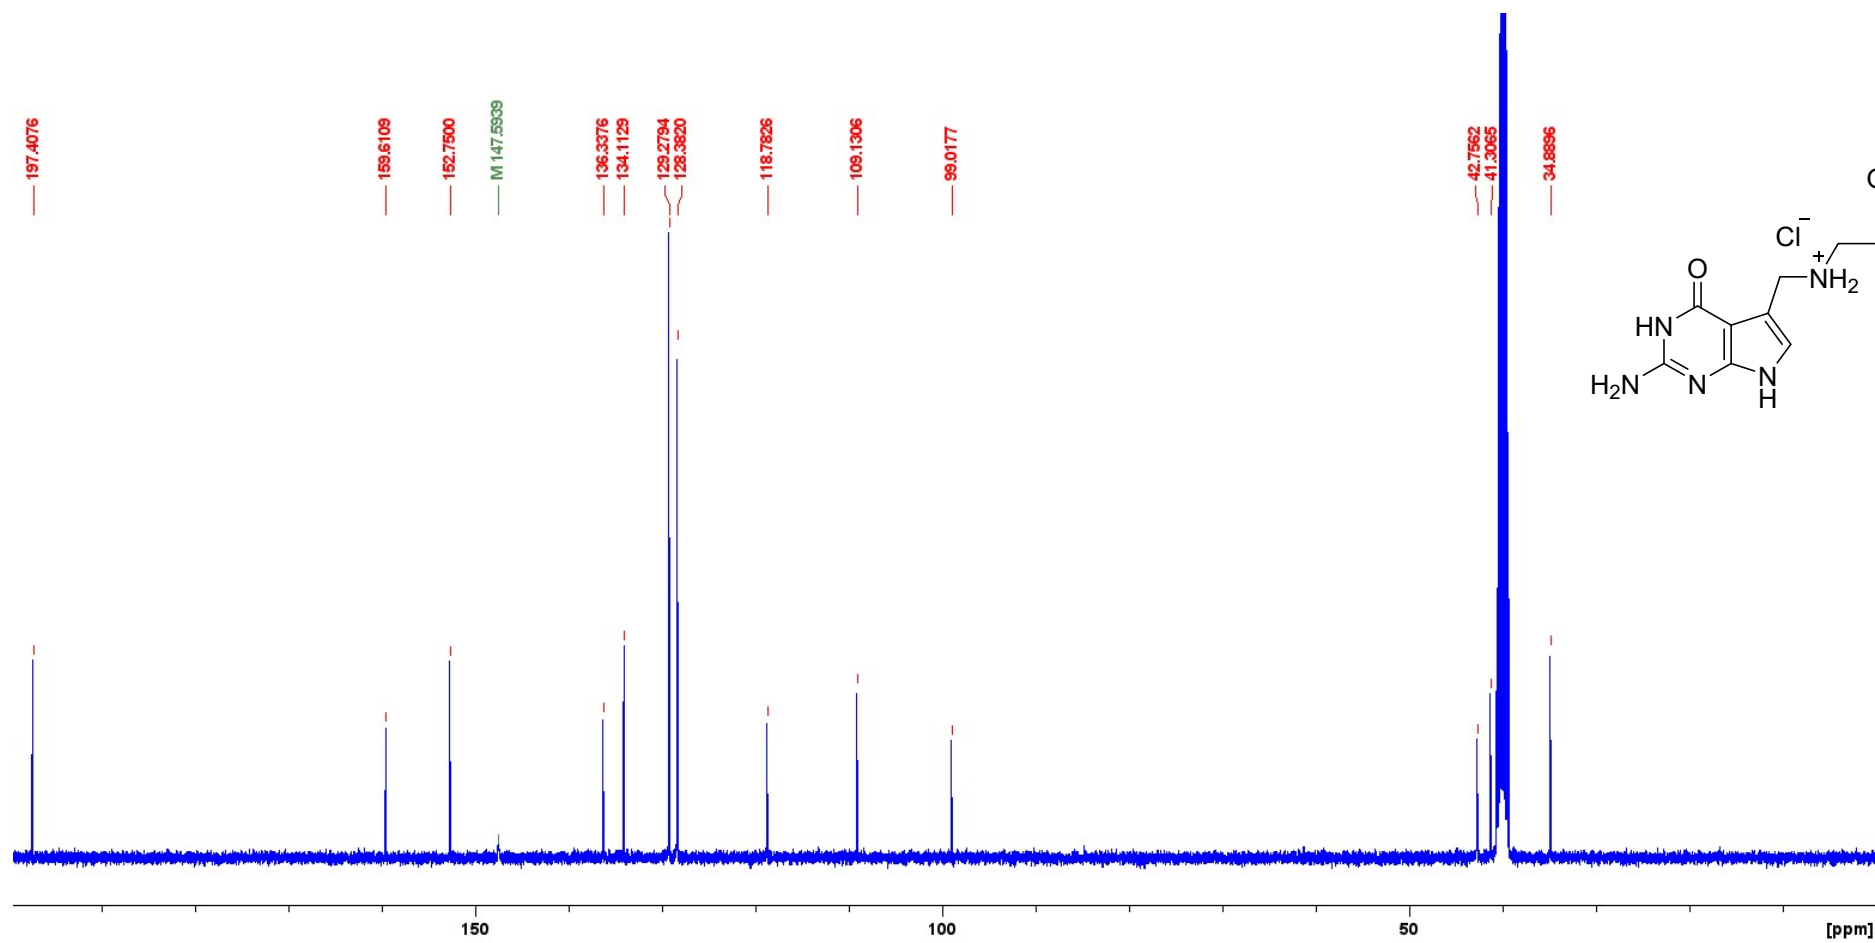

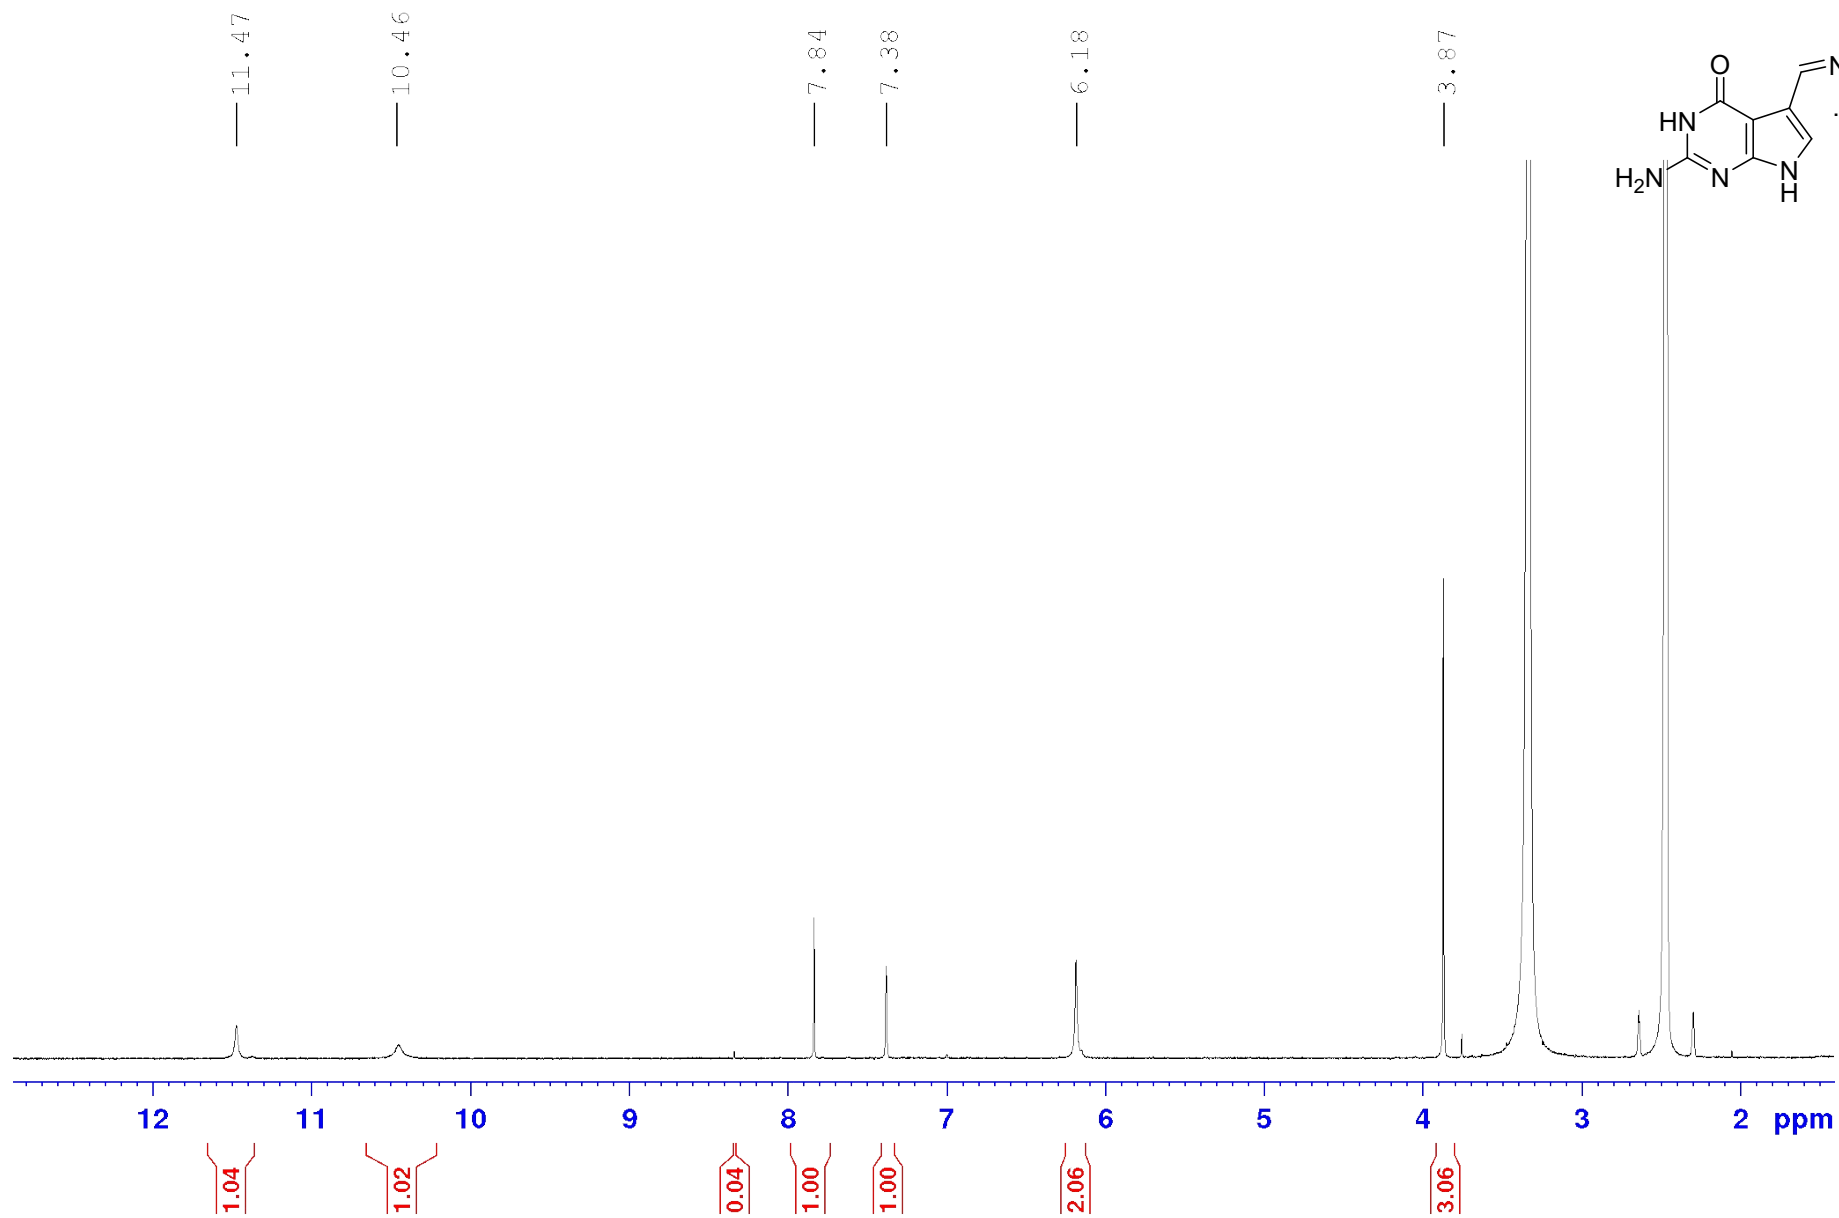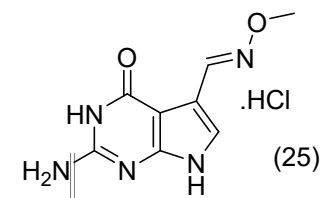



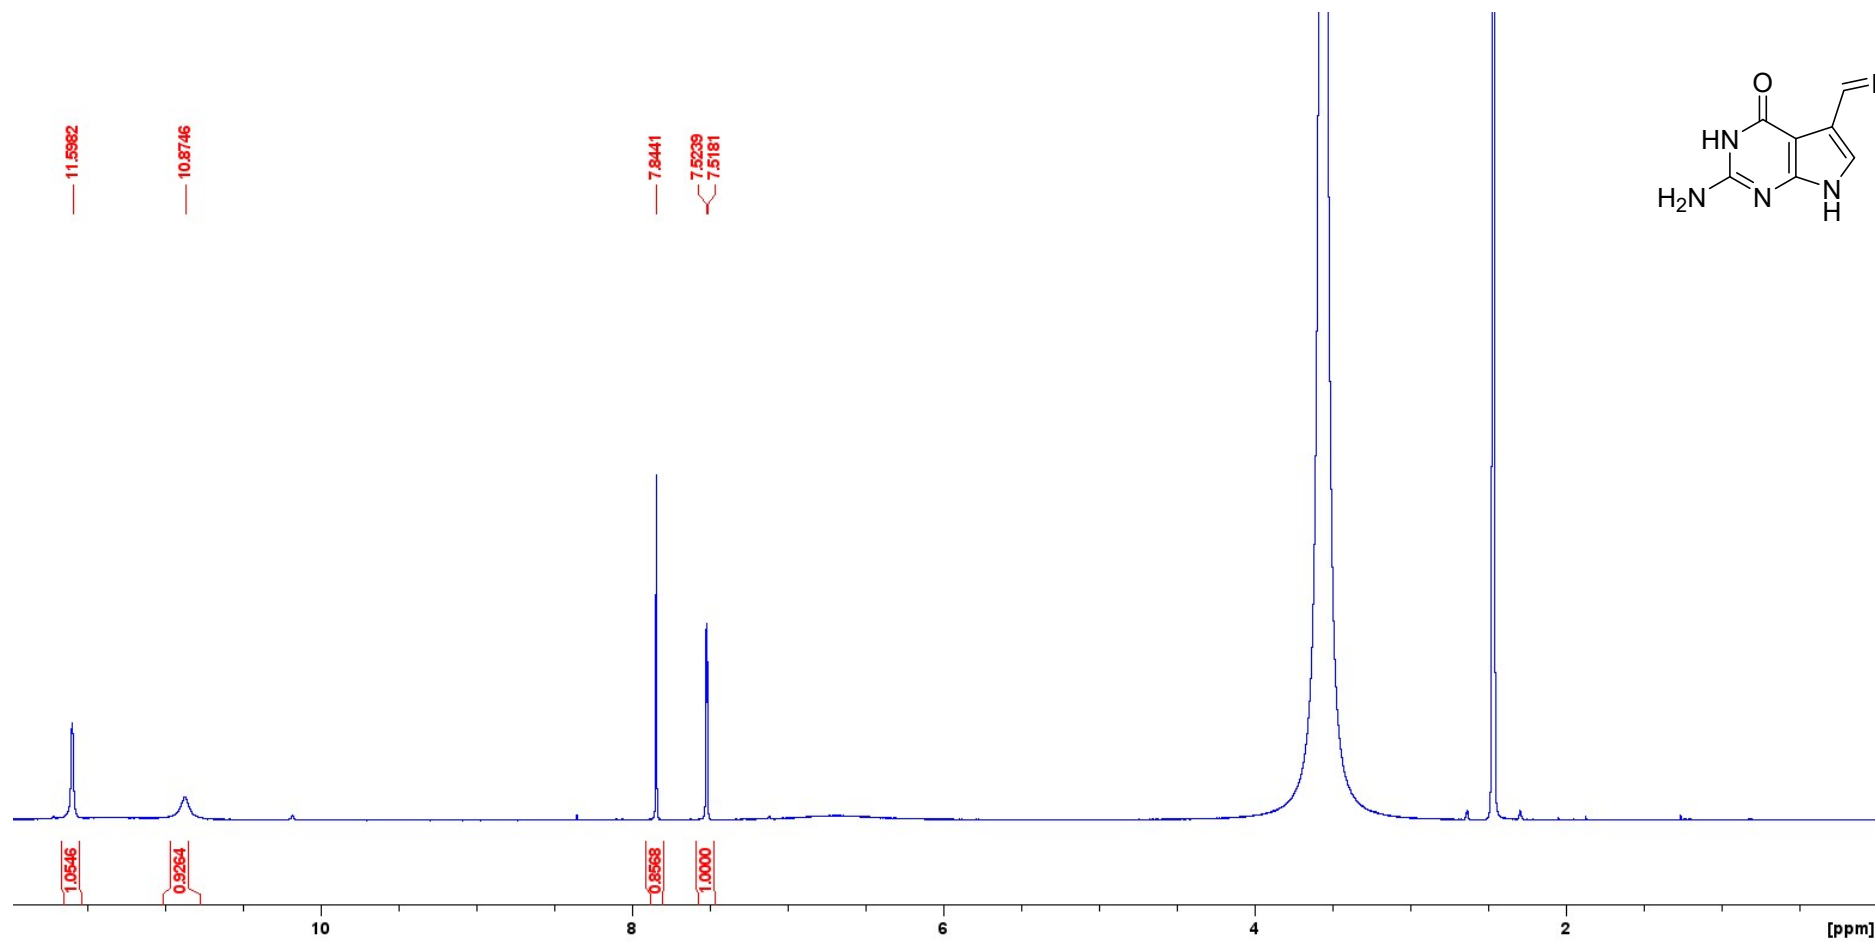

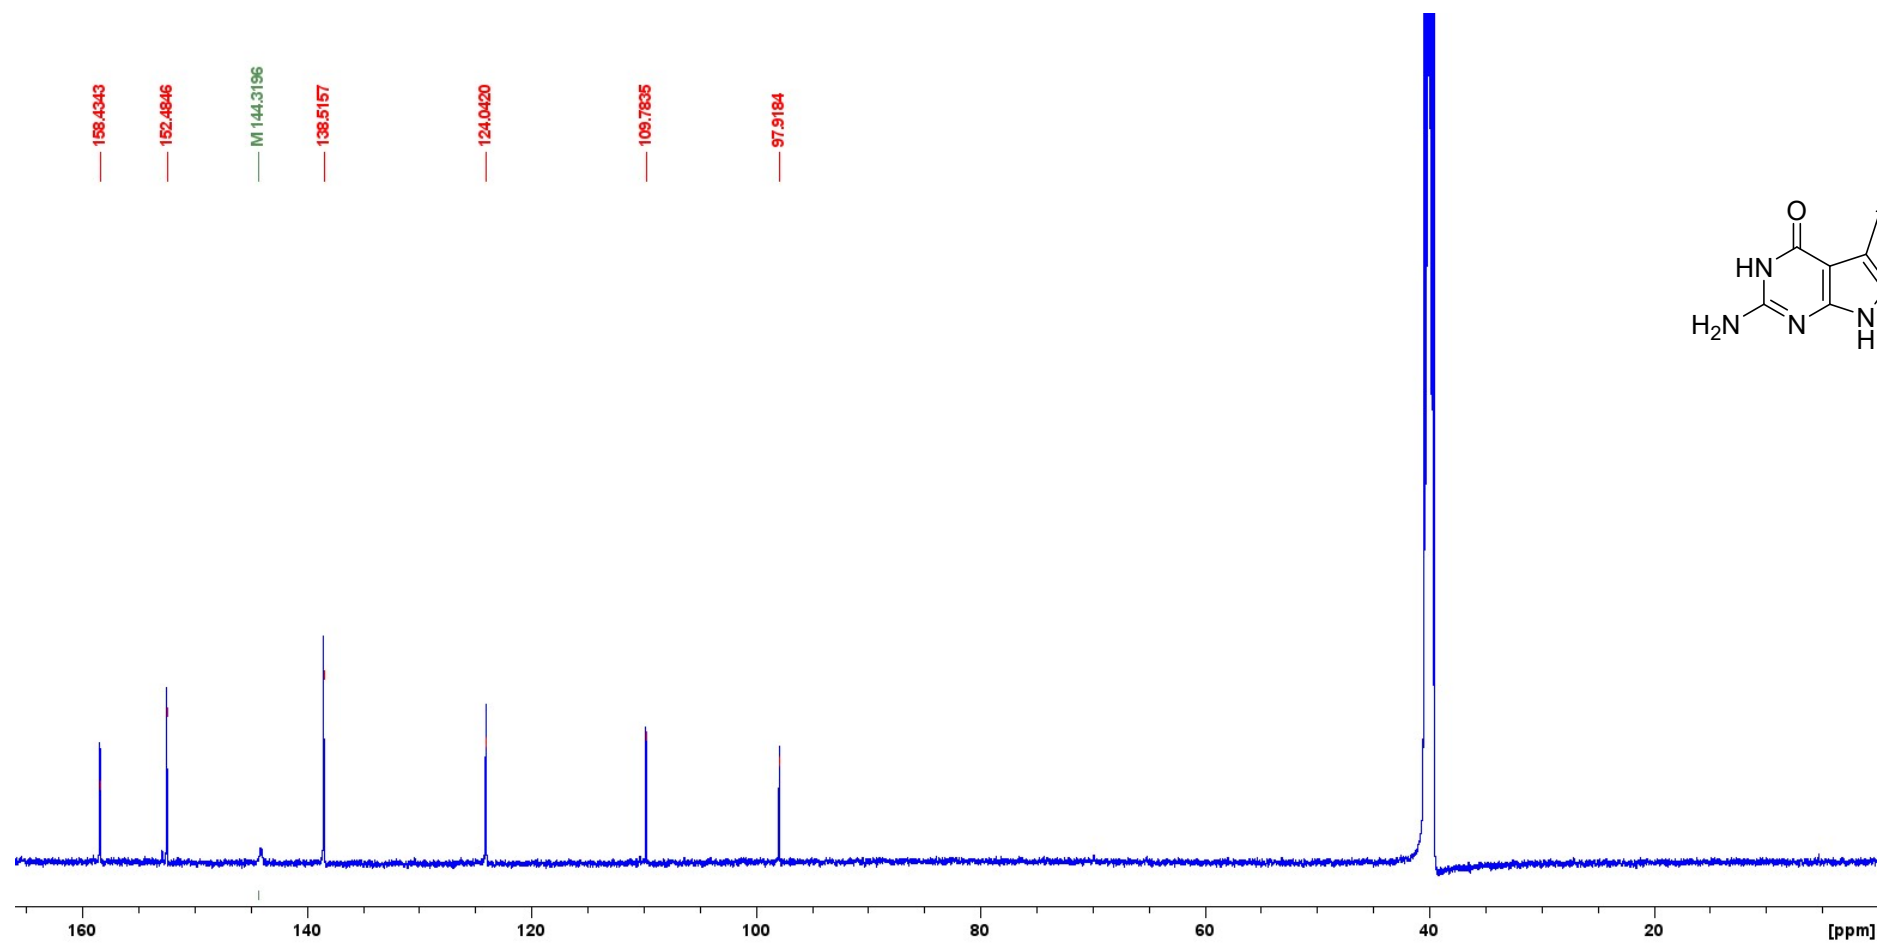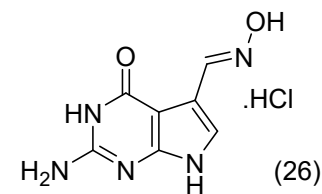

Supplement: d4md00028e1.pdf [file d4md00028e1.pdf]
